# Supplementary material
Source: publisher figshare collection journal article supplement (https://brill.figshare.com/ndownloader/files/39763309)
Supplement: Supplementary file 1 [file 39763309]

# Lack of refuge as a bottleneck for reptiles in intensive woody crops

Marta Canós-Burguete<sup>1,\*</sup>, Mizar Torrijo-Salesa<sup>1,2,\*\*</sup>, Francisco S. Tortosa<sup>1</sup>,  
José Guerrero-Casado<sup>1,\*</sup>

1 - Departamento de Zoología, Universidad de Córdoba, Edificio Charles Darwin,  
Campus Rabanales, 14701 Córdoba, Spain

2 - Seguimiento de Procesos y Recursos Naturales, Estación Biológica de Doñana,  
CSIC, Av. Américo Vespucio 26, 41092 Sevilla, Spain

\*Corresponding author: [jose.guerrero@uco.es](mailto:jose.guerrero@uco.es)

\*\*These authors contributed equally.

ORCID iDs: Canós-Burguete: 0000-0003-2781-4664; Torrijo-Salesa: 0000-0003-4881-  
2836; Tortosa: 0000-0003-0034-886X; Guerrero-Casado: 0000-0002-2537-3116

**Supplementary material**

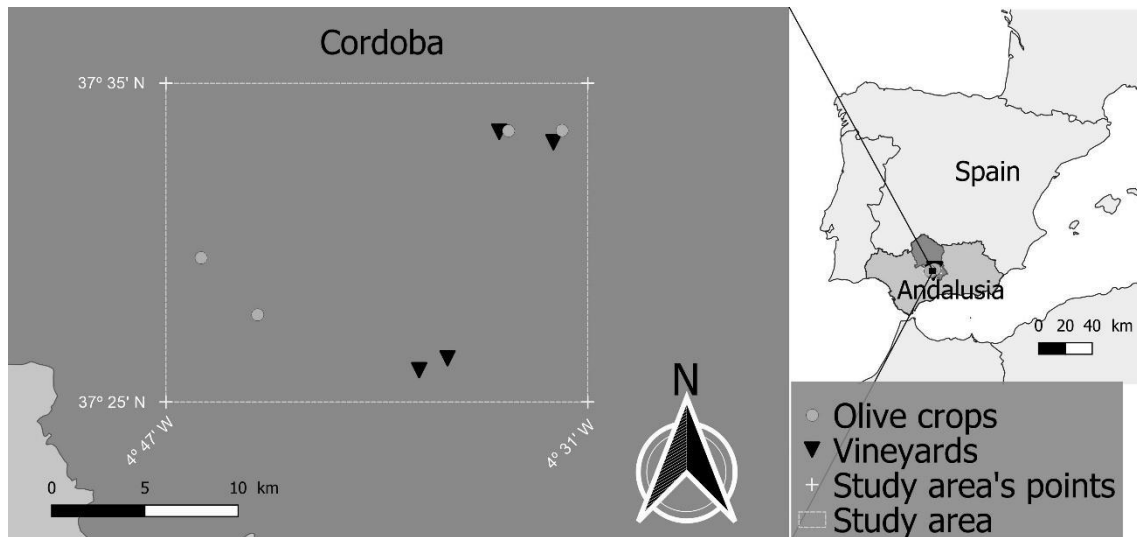

**Figure S1.** Localization of study area and the six sites. On the left, the study area is inside the square. The four areas of olive crops are represented by circles and the four areas of vineyards are represented by triangles. On the right the localization of the study area in the Iberian Peninsula.

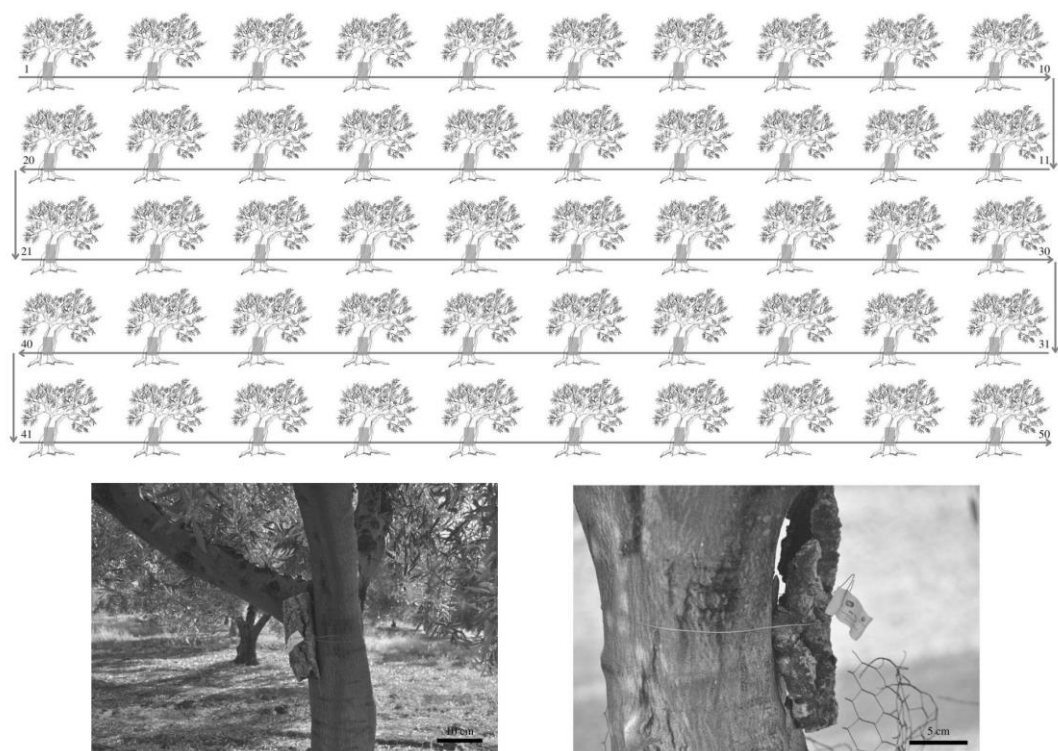

**Figure S2.** Artificial refuge distribution in olive groves. In the scheme the refuges are represented by a grey rectangle on the tree and lines represent the transects and their direction. The pictures show the artificial refuges, the position on the tree (left) and a detail of the artificial refuge (right).

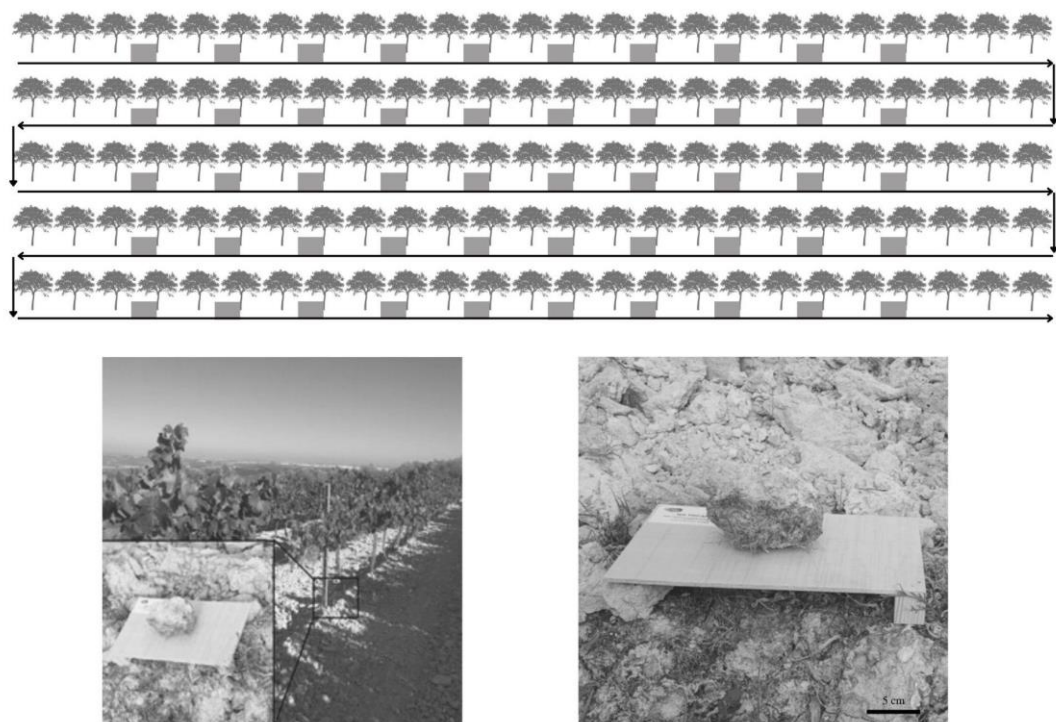

**Figure S3.** Artificial refuge distribution in vineyards. In the scheme the refuges are represented by a grey rectangle between vines on the soil and lines represent the transects and their direction. The pictures show the artificial refuges, the position on the vine row (left) and a detail of the artificial refuge (right).

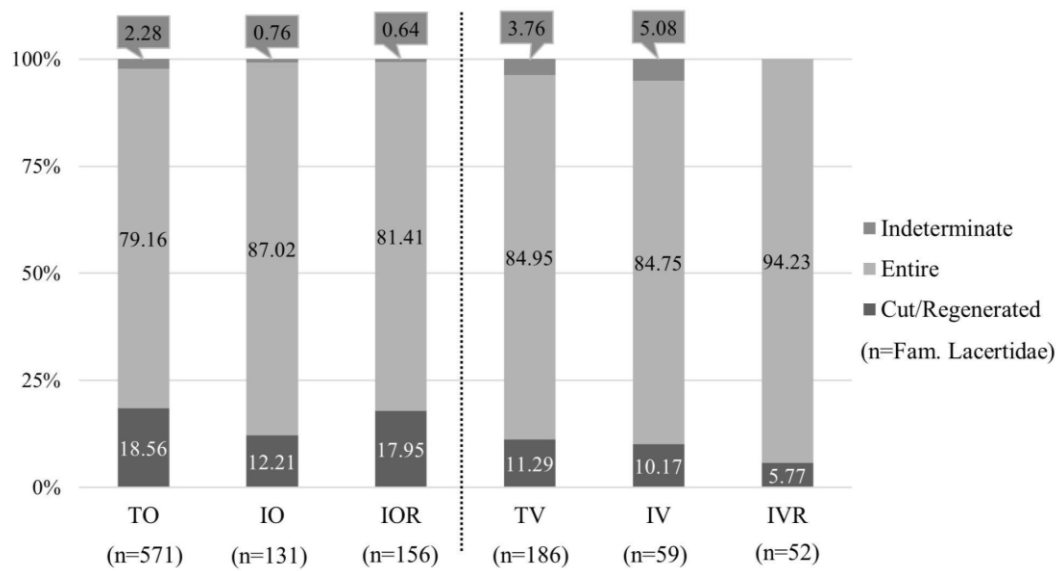

**Figure S4.** Percentage of each tail condition category among all crop types. We only include individuals of lizards (*n*), excluding geckos, snakes and unidentified individuals. ‘Indeterminate’ refers to the individuals whose tail condition could not be evaluated.

**Table S1.** Descriptive statistics (mean, standard deviation -SD-, median, maximum number recorded in a transect -max-) of the number of individuals (abundance) and the number of reptile's species (species richness) per transect recorded based on crop type. The values of rows with “*Per transect*” refers to values of the number of individuals and species detected in each transect, while the values of the standardised variable, per distance unit, are presented in the rows with “*Per 100m*”.

|     |              | Abundance |      |        |       | Species Richness |      |        |      |
|-----|--------------|-----------|------|--------|-------|------------------|------|--------|------|
|     |              | Mean      | ± SD | Median | Max   | Mean             | ± SD | Median | Max  |
| TO  | Per transect | 13.56     | 8.85 | 11.5   | 41.00 | 1.92             | 0.79 | 2.00   | 4.00 |
|     | Per 100m     | 2.45      | 1.49 | 2.09   | 7.04  | 0.35             | 0.14 | 0.34   | 0.68 |
| IO  | Per transect | 2.73      | 2.93 | 2.00   | 15.0  | 0.96             | 0.46 | 1.00   | 2.00 |
|     | Per 100m     | 0.69      | 0.75 | 0.50   | 3.82  | 0.25             | 0.13 | 0.25   | 0.56 |
| IOR | Per transect | 3.29      | 5.18 | 1.00   | 24.00 | 0.60             | 0.54 | 1.00   | 2.00 |
|     | Per 100m     | 0.82      | 1.31 | 0.27   | 6.06  | 0.15             | 0.14 | 0.24   | 0.55 |
| TV  | Per transect | 4.38      | 2.55 | 4.00   | 10.0  | 1.38             | 0.73 | 1.00   | 4.00 |
|     | Per 100m     | 0.35      | 0.21 | 0.32   | 0.80  | 0.11             | 0.05 | 0.09   | 0.29 |
| IV  | Per transect | 1.25      | 1.58 | 1.00   | 7.0   | 0.54             | 0.50 | 1.00   | 1.00 |
|     | Per 100m     | 0.10      | 0.12 | 0.08   | 0.52  | 0.04             | 0.04 | 0.07   | 0.08 |
| IVR | Per transect | 1.13      | 1.50 | 0.50   | 7.00  | 0.52             | 0.50 | 1.00   | 1.00 |
|     | Per 100m     | 0.08      | 0.11 | 0.04   | 0.52  | 0.04             | 0.04 | 0.04   | 0.08 |

TO = Traditional olive grove; IO = Intensive olive grove; IOR = Intensive olive grove with refuge;

TV = Traditional vineyard; IV = Trellis vineyard; IVR = Trellis vineyard with refuge.
